# Supplementary material for: The mediating role of physical activity and sedentary behavior in the association between working from home and musculoskeletal pain during the COVID-19 pandemic
Source: PubMed Central journal article supplement (PMC9757165; doi:10.3389/fpubh.2022.1072030), 2022-12-02
Supplement: Data_Sheet_1.pdf [file Data_Sheet_1.pdf]

## *Supplementary Material*

### 1 Supplementary Tables

**Table S1.** Overview of the used questions in the current study from the questionnaire rounds of the Lifelines COVID-19 cohort from March 2020 to January 2022.

| <b>Round</b> | <b>Date</b>          | <b>Determinant: work situation question</b> | <b>Mediators: physical activity (PA) and sedentary behavior (SB) questions</b> | <b>Outcomes: Pain in lower back (LB), upper back (UB), arm, neck, and/or shoulder (ANS) questions</b> |
|--------------|----------------------|---------------------------------------------|--------------------------------------------------------------------------------|-------------------------------------------------------------------------------------------------------|
| 1            | Mar to Apr 2020      | Work situation                              | PA                                                                             | -                                                                                                     |
| 2            | Apr to May 2020      | Work situation                              | PA                                                                             | Pain in LB                                                                                            |
| 3            | Apr to May 2020      | Work situation                              | PA                                                                             | Pain in LB                                                                                            |
| 4            | Apr to May 2020      | Work situation                              | PA                                                                             | Pain in LB                                                                                            |
| 5            | Apr to May 2020      | Work situation                              | PA                                                                             | Pain in LB                                                                                            |
| 6            | Apr to May 2020      | Work situation                              | PA + SB                                                                        | Pain in LB                                                                                            |
| 7            | May 2020             | Work situation                              | PA                                                                             | Pain in LB                                                                                            |
| 8            | May to Jun 2020      | Work situation                              | PA                                                                             | Pain in LB + UB + ANS                                                                                 |
| 9            | Jun 2020             | -                                           | -                                                                              | Pain in LB + UB + ANS                                                                                 |
| 10           | Jul 2020             | -                                           | -                                                                              | -                                                                                                     |
| 11           | Jul to Aug 2020      | Work situation                              | PA + SB                                                                        | -                                                                                                     |
| 12           | Jul to Sep 2020      | -                                           | -                                                                              | Pain in LB + UB + ANS                                                                                 |
| 13           | Sep 2020             | -                                           | -                                                                              | -                                                                                                     |
| 14           | Oct to Nov 2020      | Work situation                              | PA + SB                                                                        | -                                                                                                     |
| 15           | Nov 2020             | Work situation                              | PA + SB                                                                        | Pain in LB + UB + ANS                                                                                 |
| 15b          | Nov to Dec 2020      | -                                           | -                                                                              | Pain in LB + UB + ANS                                                                                 |
| 16           | Dec 2020             | Work situation                              | PA + SB                                                                        | -                                                                                                     |
| 16b          | Dec 2020 to Jan 2021 | -                                           | -                                                                              | Pain in LB + UB + ANS                                                                                 |
| 17           | Jan to Feb 2021      | Work situation                              | PA + SB                                                                        | -                                                                                                     |
| 18           | Feb to Mar 2021      | -                                           | -                                                                              | Pain in LB + UB + ANS                                                                                 |
| 19           | Mar to Apr 2021      | Work situation                              | PA + SB                                                                        | -                                                                                                     |
| 20           | Apr to May 2021      | -                                           | -                                                                              | Pain in LB + UB + ANS                                                                                 |
| 21           | May to Jun 2021      | Work situation                              | PA + SB                                                                        | -                                                                                                     |
| 22           | Jul 2021             | -                                           | -                                                                              | Pain in LB + UB + ANS                                                                                 |
| 23           | Oct to Nov 2021      | Work situation                              | PA + SB                                                                        | -                                                                                                     |
| 24           | Dec 2021 to Jan 2022 | -                                           | -                                                                              | Pain in LB + UB + ANS                                                                                 |

**Table S2.** Characteristics of the study population stratified for location workers, home workers, and hybrid workers (who worked both on location and from home) during the COVID-19 pandemic from March 2020-January 2022 (n=28,586)

|                                                        | Location workers<br>(n=13,489) |       | Home workers<br>(n=5,971) |      | Hybrid workers<br>(n=9,126) |      |
|--------------------------------------------------------|--------------------------------|-------|---------------------------|------|-----------------------------|------|
|                                                        | Mean/%                         | SD/n  | Mean/%                    | SD/n | Mean/%                      | SD/n |
| Age (in years)                                         | 50.9                           | 8.6   | 49.3*                     | 9.1  | 49.1†                       | 9.3  |
| Sex (% female)                                         | 61.3                           | 8264  | 56.6*                     | 3377 | 60.3                        | 5503 |
| Educational level (%)                                  |                                |       |                           |      |                             |      |
| Low                                                    | 20.8                           | 2807  | 5.3*                      | 317  | 4.9†                        | 445  |
| Middle                                                 | 55.7                           | 7511  | 28.9*                     | 1724 | 30.4†                       | 2778 |
| High                                                   | 23.5                           | 3171  | 65.8*                     | 3930 | 64.7†                       | 5903 |
| Household composition (%)                              |                                |       |                           |      |                             |      |
| Living alone                                           | 7.8                            | 1058  | 8.1                       | 484  | 6.9†                        | 628  |
| Living together with child(ren)                        | 1.4                            | 191   | 2.4*                      | 141  | 1.9†                        | 172  |
| Living together with adult(s)                          | 53.8                           | 7251  | 47.5*                     | 2838 | 47.7†                       | 4354 |
| Living together with child(ren) and adult(s)           | 35.8                           | 4829  | 40.8*                     | 2438 | 42.4†                       | 3866 |
| Living together but unknown with whom                  | 1.2                            | 160   | 1.2                       | 70   | 1.2                         | 106  |
| Born in the Netherlands (% yes)                        | 98.2                           | 13248 | 97.5*                     | 5821 | 98.2                        | 8964 |
| Occupation (%)                                         |                                |       |                           |      |                             |      |
| High-skilled white-collar                              | 42.2                           | 5693  | 73.2*                     | 4373 | 72.4†                       | 6605 |
| Low-skilled white-collar                               | 34.2                           | 4607  | 23.2*                     | 1388 | 22.3†                       | 2039 |
| High-skilled blue-collar                               | 11.2                           | 1515  | 2.1*                      | 128  | 3.5†                        | 323  |
| Low-skilled blue-collar                                | 12.4                           | 1674  | 1.4*                      | 82   | 1.7†                        | 159  |
| Occupational class (%)                                 |                                |       |                           |      |                             |      |
| Educational occupations                                | 2.7                            | 358   | 8.3*                      | 495  | 16.4†                       | 1500 |
| Creative and linguistic occupations                    | 0.8                            | 102   | 3.1*                      | 184  | 2.4†                        | 216  |
| Commercial occupations                                 | 9.0                            | 1220  | 8.0*                      | 476  | 6.7†                        | 615  |
| Business economics and administrative occupations      | 15.7                           | 2114  | 37.9*                     | 2262 | 27.4†                       | 2505 |
| Managers                                               | 3.9                            | 530   | 5.7*                      | 343  | 6.7†                        | 616  |
| Public administration, security, and legal occupations | 2.4                            | 330   | 6.6*                      | 392  | 4.5†                        | 411  |
| Technical occupations                                  | 15.8                           | 2126  | 6.9*                      | 410  | 8.7†                        | 793  |
| ICT occupations                                        | 1.0                            | 132   | 11.5*                     | 687  | 5.0†                        | 455  |
| Agricultural occupations                               | 1.7                            | 236   | 1.1*                      | 66   | 1.6                         | 144  |
| Care and welfare occupations                           | 33.2                           | 4482  | 8.1*                      | 482  | 17.2†                       | 1567 |
| Service occupations                                    | 8.3                            | 1115  | 2.4*                      | 141  | 2.6†                        | 237  |
| Transport and logistics occupations                    | 5.2                            | 708   | 0.5*                      | 32   | 0.7†                        | 63   |
| Employment contract (%)                                |                                |       |                           |      |                             |      |
| Permanent contract                                     | 79.1                           | 10669 | 75.0*                     | 4479 | 70.2†                       | 6404 |
| Permanent and non-permanent contract                   | 8.9                            | 1202  | 6.3*                      | 377  | 14.2†                       | 1293 |
| Non-permanent contract                                 | 12.0                           | 1618  | 18.7*                     | 1115 | 15.7†                       | 1429 |
| General health (% excellent/(very) good)               | 96.5                           | 13019 | 95.3*                     | 5693 | 95.9†                       | 8748 |

|                                                                             |      |      |       |      |       |      |
|-----------------------------------------------------------------------------|------|------|-------|------|-------|------|
| ≥150 minutes of physical activity per week before COVID-19 pandemic (% yes) | 41.9 | 5651 | 44.6* | 2662 | 42.1  | 3838 |
| Sitting >9 hours per work day before COVID-19 pandemic (% yes) <sup>1</sup> | 12.1 | 913  | 43.3* | 1274 | 30.4* | 1902 |

\* Statistically significant difference (p<0.05) between home workers and location workers tested with independent-samples t-test and chi-square test.

† Statistically significant difference (p<0.05) between hybrid workers and location workers tested with independent-samples t-test and chi-square test.

1 Among 7573 locations workers, 2943 home workers, and 6264 hybrid workers.

2 Supplementary Figures

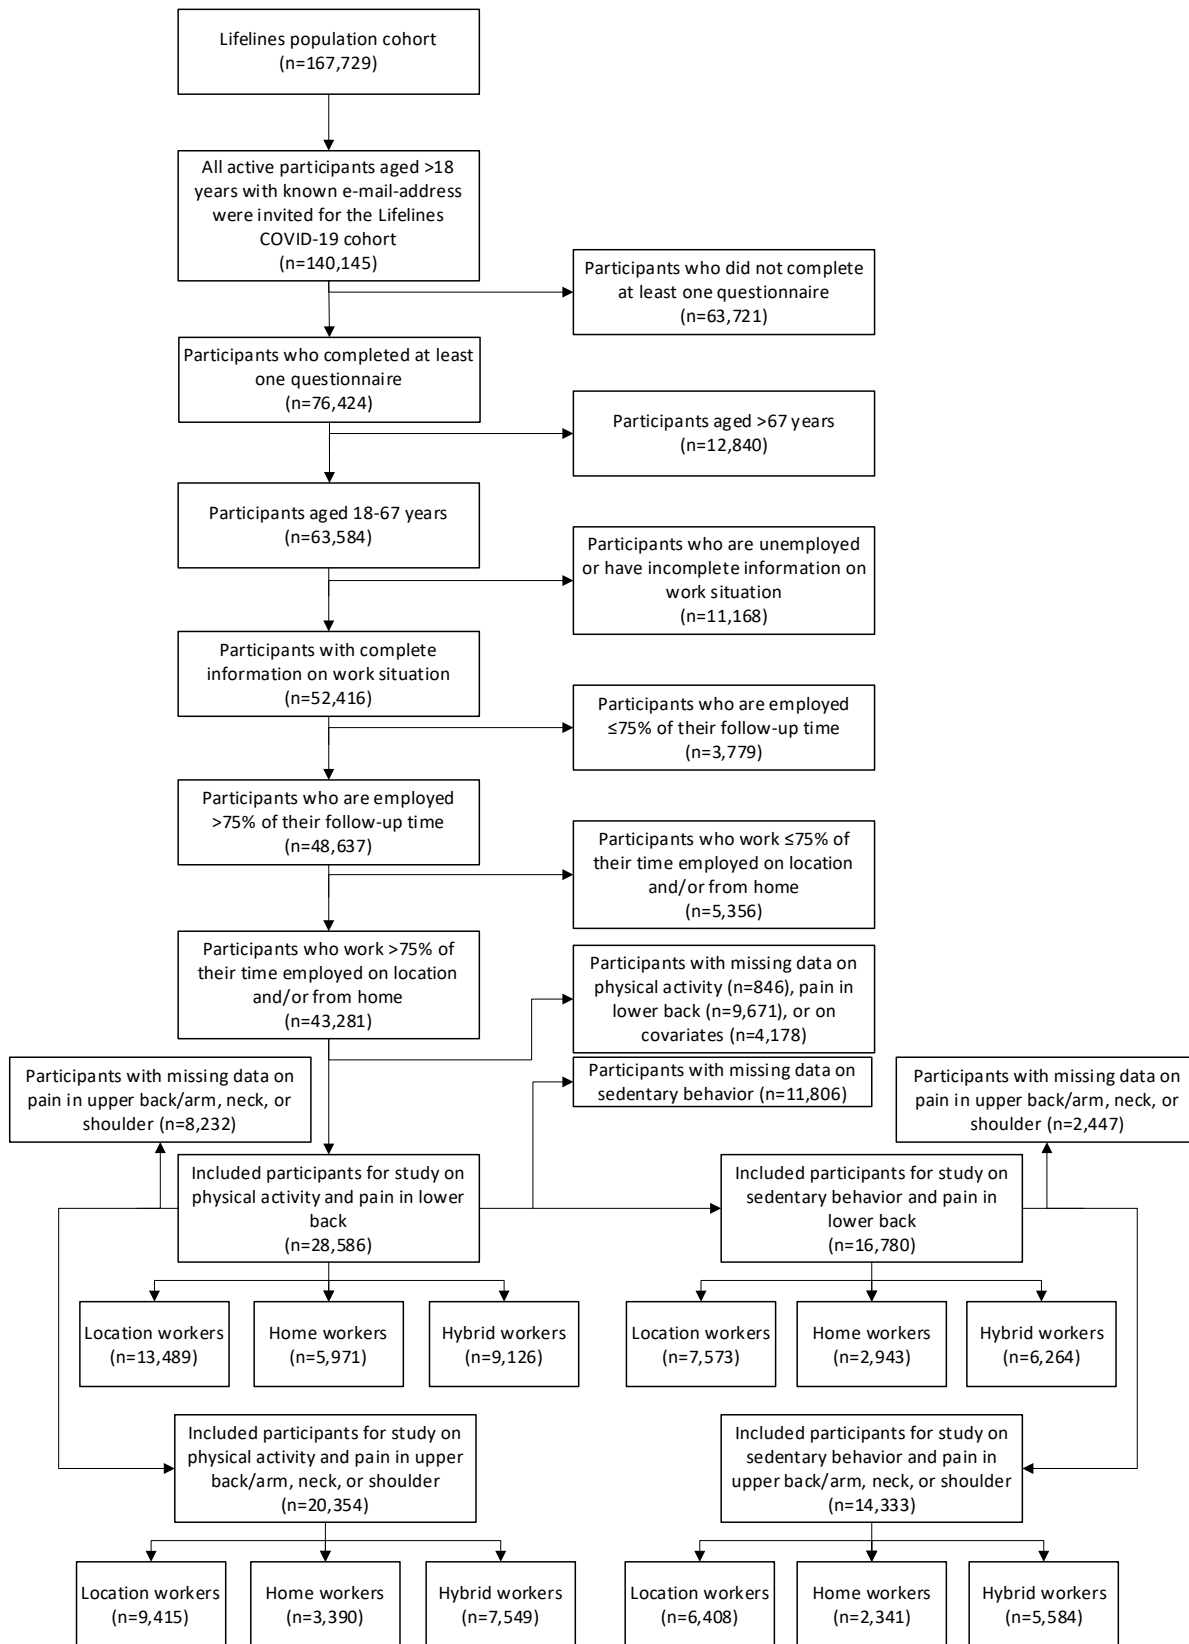

Figure S1. Flowchart of study participants

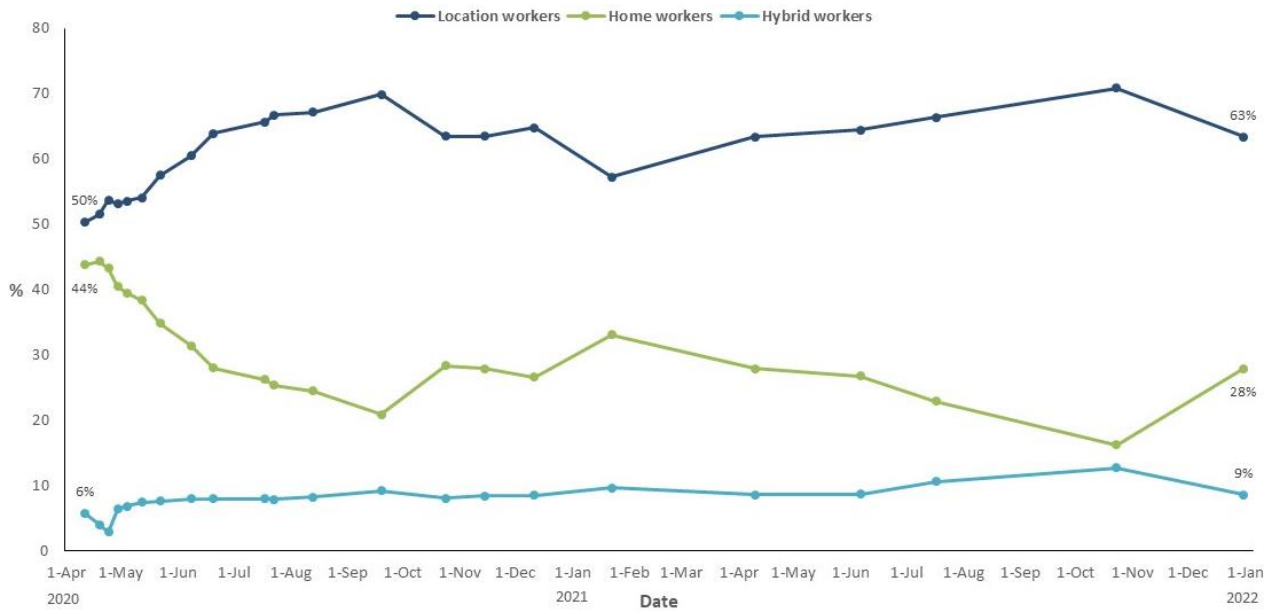

**Figure S2.** Percentages of location workers, home workers, and hybrid workers at 24 questionnaire rounds during the study period (March 2020–January 2022) among 28,586 workers. Every datapoint represents the median date of the particular questionnaire round.
